# Supplementary material
Source: publisher figshare collection journal article supplement (https://karger.figshare.com/articles/dataset/_/5325010)
Supplement: Supplementary file 1 [file 1]

**Table S2 Strains and plasmids used in this study**

| Strains or plasmids                                               | Relevant characteristics                                                                                                               | Sources                           |
|-------------------------------------------------------------------|----------------------------------------------------------------------------------------------------------------------------------------|-----------------------------------|
| <b>Bacterial strains</b>                                          |                                                                                                                                        |                                   |
| <i>S. spinosa</i> ATCC49460                                       | Wide-type strain                                                                                                                       | CGMCC                             |
| <b><i>Streptomyces</i></b>                                        |                                                                                                                                        |                                   |
| <i>S. avermitilis</i> ATCC31267                                   | Wide-type strain                                                                                                                       | CGMCC                             |
| <i>S. coelicolor</i> M145                                         | Wide-type strain                                                                                                                       | CGMCC                             |
| <i>S. coelicolor</i> M1154                                        | $\Delta act, \Delta red, \Delta cpk, \Delta cda, rpoB[C1298T], rpsL[A262G]$                                                            | [1]                               |
| <i>S. albus</i> ATCC39012                                         | Wide-type strain                                                                                                                       | CGMCC                             |
| <i>S. lividans</i> TK24                                           | <i>RpsL</i> (S <sub>mr</sub> ) <i>Act</i> + <i>Red</i> <sup>+</sup>                                                                    | John Innes Centre,<br>Norwich, UK |
| <i>S. venezuelae</i> ATCC 15439                                   | Wide-type strain                                                                                                                       | CGMCC                             |
| <i>S. avermitilis</i> ATCC 31267 BAC- <i>spn</i> -152- <i>rha</i> | <i>S. avermitilis</i> ATCC 31267 containing BAC- <i>spn</i> -152- <i>rha</i>                                                           | Present study                     |
| <i>S. coelicolor</i> M145 BAC- <i>spn</i> -152- <i>rha</i>        | <i>S. coelicolor</i> M145 containing BAC- <i>spn</i> -152- <i>rha</i>                                                                  | Present study                     |
| <i>S. lividans</i> TK24 BAC- <i>spn</i> -152- <i>rha</i>          | <i>S. lividans</i> TK24 containing BAC- <i>spn</i> -152- <i>rha</i>                                                                    | Present study                     |
| <i>S. venezuelae</i> ATCC 15439 BAC- <i>spn</i> -152- <i>rha</i>  | <i>S. venezuelae</i> ATCC 15439 containing BAC- <i>spn</i> -152- <i>rha</i>                                                            | Present study                     |
| <i>S. albus</i> ATCC39012 BAC- <i>spn</i> -152- <i>rha</i>        | <i>S. albus</i> ATCC39012 containing BAC- <i>spn</i> -152- <i>rha</i>                                                                  | Present study                     |
| <i>S. coelicolor</i> M1154 BAC- <i>spn</i> -152- <i>rha</i>       | <i>S. coelicolor</i> M1154 containing BAC- <i>spn</i> -152- <i>rha</i>                                                                 | Present study                     |
| <b><i>E. coli</i></b>                                             |                                                                                                                                        |                                   |
| DH5 $\alpha$                                                      | <i>recA1, endA1, hsdR17, gyrA96, relA1,</i>                                                                                            | Stratagene                        |
| ET12567 (pUZ8002)                                                 | Nonmethylation strain ( <i>dam</i> <sup>-</sup> <i>dcm</i> <sup>-</sup> <i>hsdM</i> <sup>-</sup> ),<br>TetR, CmR                       | [2]                               |
| BW25113                                                           | K-12 BD792 derivative: <i>lacIq, rrnBT14, <math>\Delta lacZ</math>WJ16, hsdR514, <math>\Delta araBADAH33, \Delta rhaBADLD78</math></i> | [3]                               |
| <b>Plasmids</b>                                                   |                                                                                                                                        |                                   |
| pJL117                                                            | pIJ2925 derivative carrying the <i>ermE</i> *P from pIJ4090                                                                            | [4]                               |
| pKD10                                                             | Derived from pKD20, Amp <sup>r</sup>                                                                                                   | [5]                               |
| pCC1BAC BamHI                                                     | BAC cloning vector                                                                                                                     | <u>Epicentre</u>                  |
| pSET152                                                           | Integrative vector                                                                                                                     | [3]                               |

|                                  |                                                                                                                                    |               |
|----------------------------------|------------------------------------------------------------------------------------------------------------------------------------|---------------|
| BAC- <i>spn</i>                  | pCC1BAC with ~100 kb DNA insert containing the whole<br><i>spn</i> gene cluster                                                    | Present study |
| BAC- <i>spn</i> -152             | BAC- <i>spn</i> derivative containing the 4.3 kb fragment of<br>pSET152 containing <i>aac3</i> (IV), <i>oriT</i> , <i>attP-int</i> | Present study |
| BAC- <i>spn</i> -152- <i>rha</i> | BAC- <i>spn</i> -152 derivative integrated with <i>gtt</i> , <i>gdh</i> , <i>kre</i> , <i>epi</i>                                  | Present study |

#CGMCC: China General Microbiological Culture Collection Center.

## References

- [1]Gomez-Escribano JP, Bibb MJ: **Engineering *Streptomyces coelicolor* for heterologous expression of secondary metabolite gene clusters.** *Microb Biotechnol* 2011, 4(2): 207-215.
- [2]MacNeil DJ, Gewain KM, Ruby CL, Dezeny G, Gibbons PH, MacNeil T: **Analysis of *Streptomyces avermitilis* genes required for avermectin biosynthesis utilizing a novel integration vector.** *Gene* 1992, 111(1):61-68.
- [3]Datsenko KA, Wanner BL. **One-step inactivation of chromosomal genes in *Escherichia coli* K-12 using PCR products.** *Proc Natl Acad Sci USA* 2000, 97(12): 6640-6645.
- [4]Zhao JL: **Regulation mechanism of avermectin biosynthesis.** *PhD thesis*. China Agricultural University, Microbiology and Immunology Department; 2006.
- [5]Bierman M, Logan R, O'Brien K, Seno ET, Rao RN, Schoner BE: **Plasmid cloning vectors for the conjugal transfer of DNA from *Escherichia coli* to *Streptomyces* spp.** *Gene* 1992, 116(1):43-49.
