# Supplementary material
Source: publisher figshare collection journal article supplement (https://karger.figshare.com/articles/dataset/_/5325010)
Supplement: Supplementary file 2 [file 1]

**Table 1: Comparison of homologous proteins involved in rhamnose synthesis between *S. spinosa* and *Streptomyces* hosts**

| Name | Size<br>(aa) | Accession<br>number<br>( <i>S. spinosa</i> ) | Function                    | Identities/ Similarities %<br>[GenPept: Accession number] |                                    |                            |                              |                                    |
|------|--------------|----------------------------------------------|-----------------------------|-----------------------------------------------------------|------------------------------------|----------------------------|------------------------------|------------------------------------|
|      |              |                                              |                             | <i>S. coelicolor</i><br>M145                              | <i>S. avermitilis</i><br>ATCC31267 | <i>S. lividans</i><br>TK24 | <i>S. albus</i><br>ATCC39012 | <i>S. venezuelae</i><br>ATCC 15439 |
| Gtt  | 293          | AAK83289                                     | Nucleotidyl-<br>transferase | 69/82<br>[YP_009091171]                                   | 69/82<br>[NP_822122]               | 27/49<br>[WP_003977438]    | 57/72<br>[WP_003951756]      | 72/84<br>[WP_015037177]            |
| Gdh  | 329          | AAK83290                                     | Dehydratase                 | 71/83<br>[YP_009091170]                                   | 71/83<br>[NP_822121]               | 27/38<br>[WP_003975202]    | 65/73<br>[WP_032783975]      | 63/74<br>[YP_006881543]            |
| Kre  | 305          | AAK83291                                     | Ketoreductase               | 30/42<br>[WP_011031499]                                   | 31/43<br>[NP_821533]               | 30/42<br>[WP_016327984]    | 31/43<br>[WP_032784109]      | 30/42<br>[YP_006881132]            |
| Epi  | 202          | AAK83288                                     | Epimerase                   | 54/66<br>[YP_009091173]                                   | 54/66<br>[NP_822124]               | 33/46<br>[EFD71560]        | 60/72<br>[WP_030544290]      | 52/66<br>[YP_006881544]            |
