# Supplementary material
Source: publisher figshare collection journal article supplement (https://karger.figshare.com/articles/dataset/_/5325010)

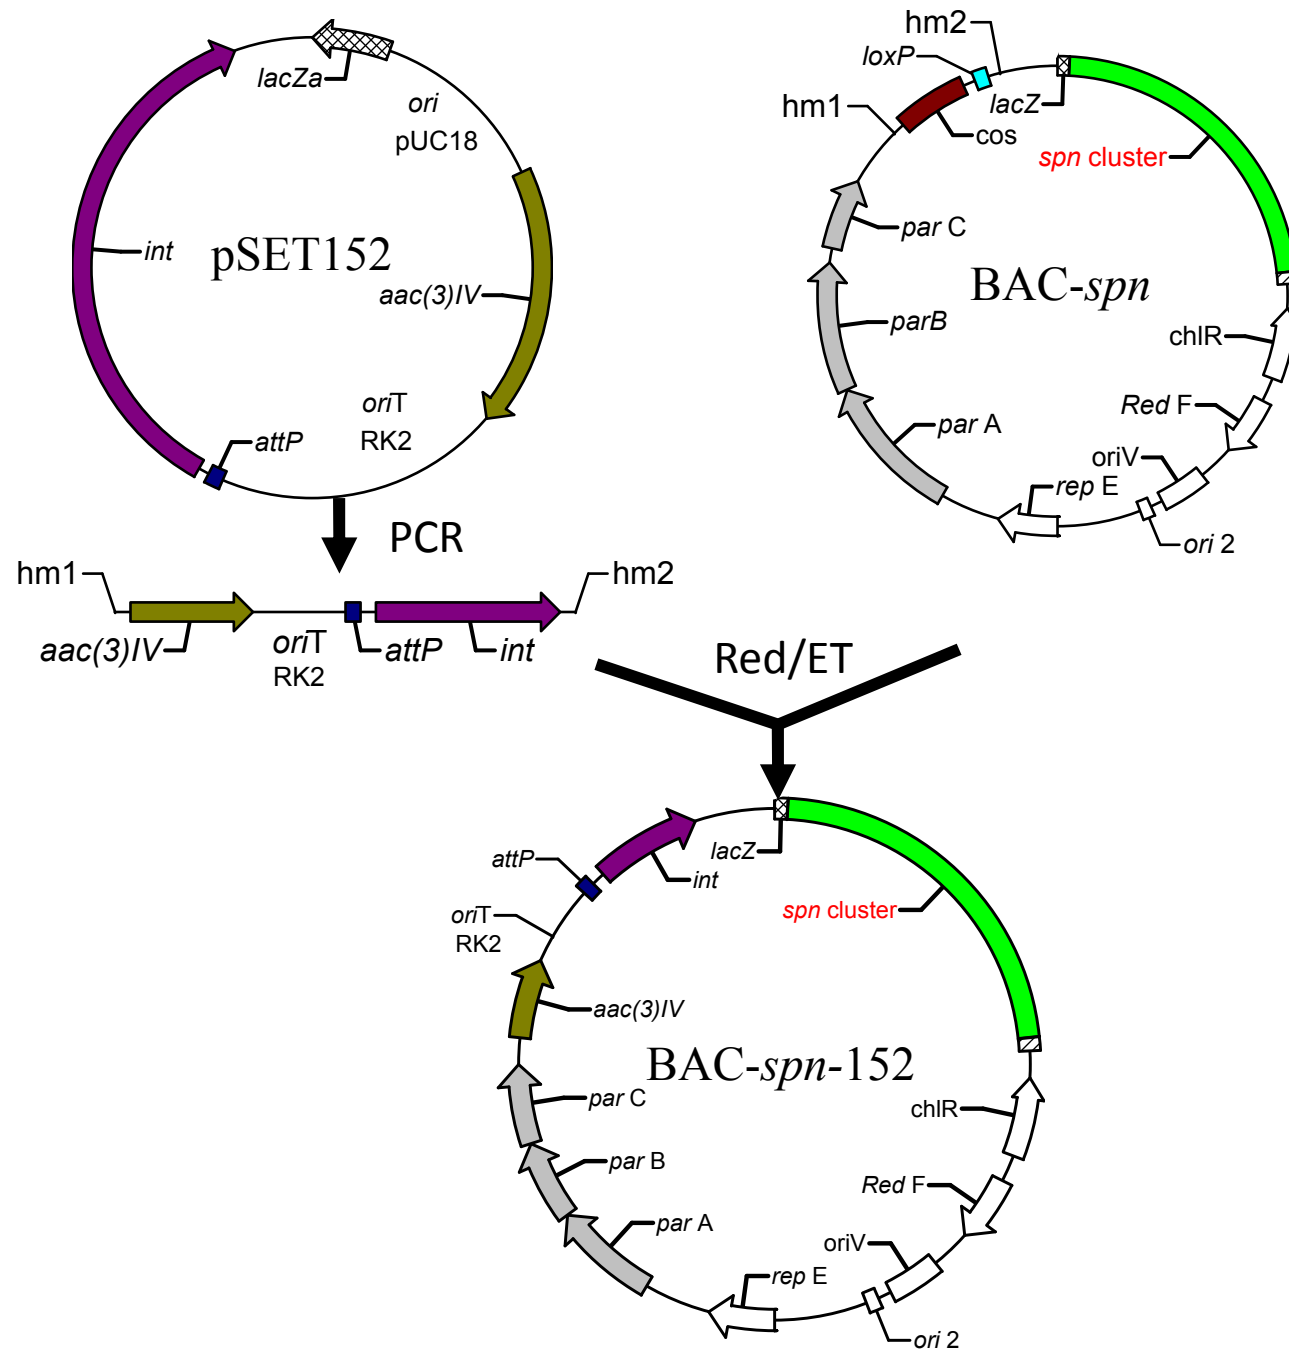

Supplement: Supplementary file 3 [file 1]

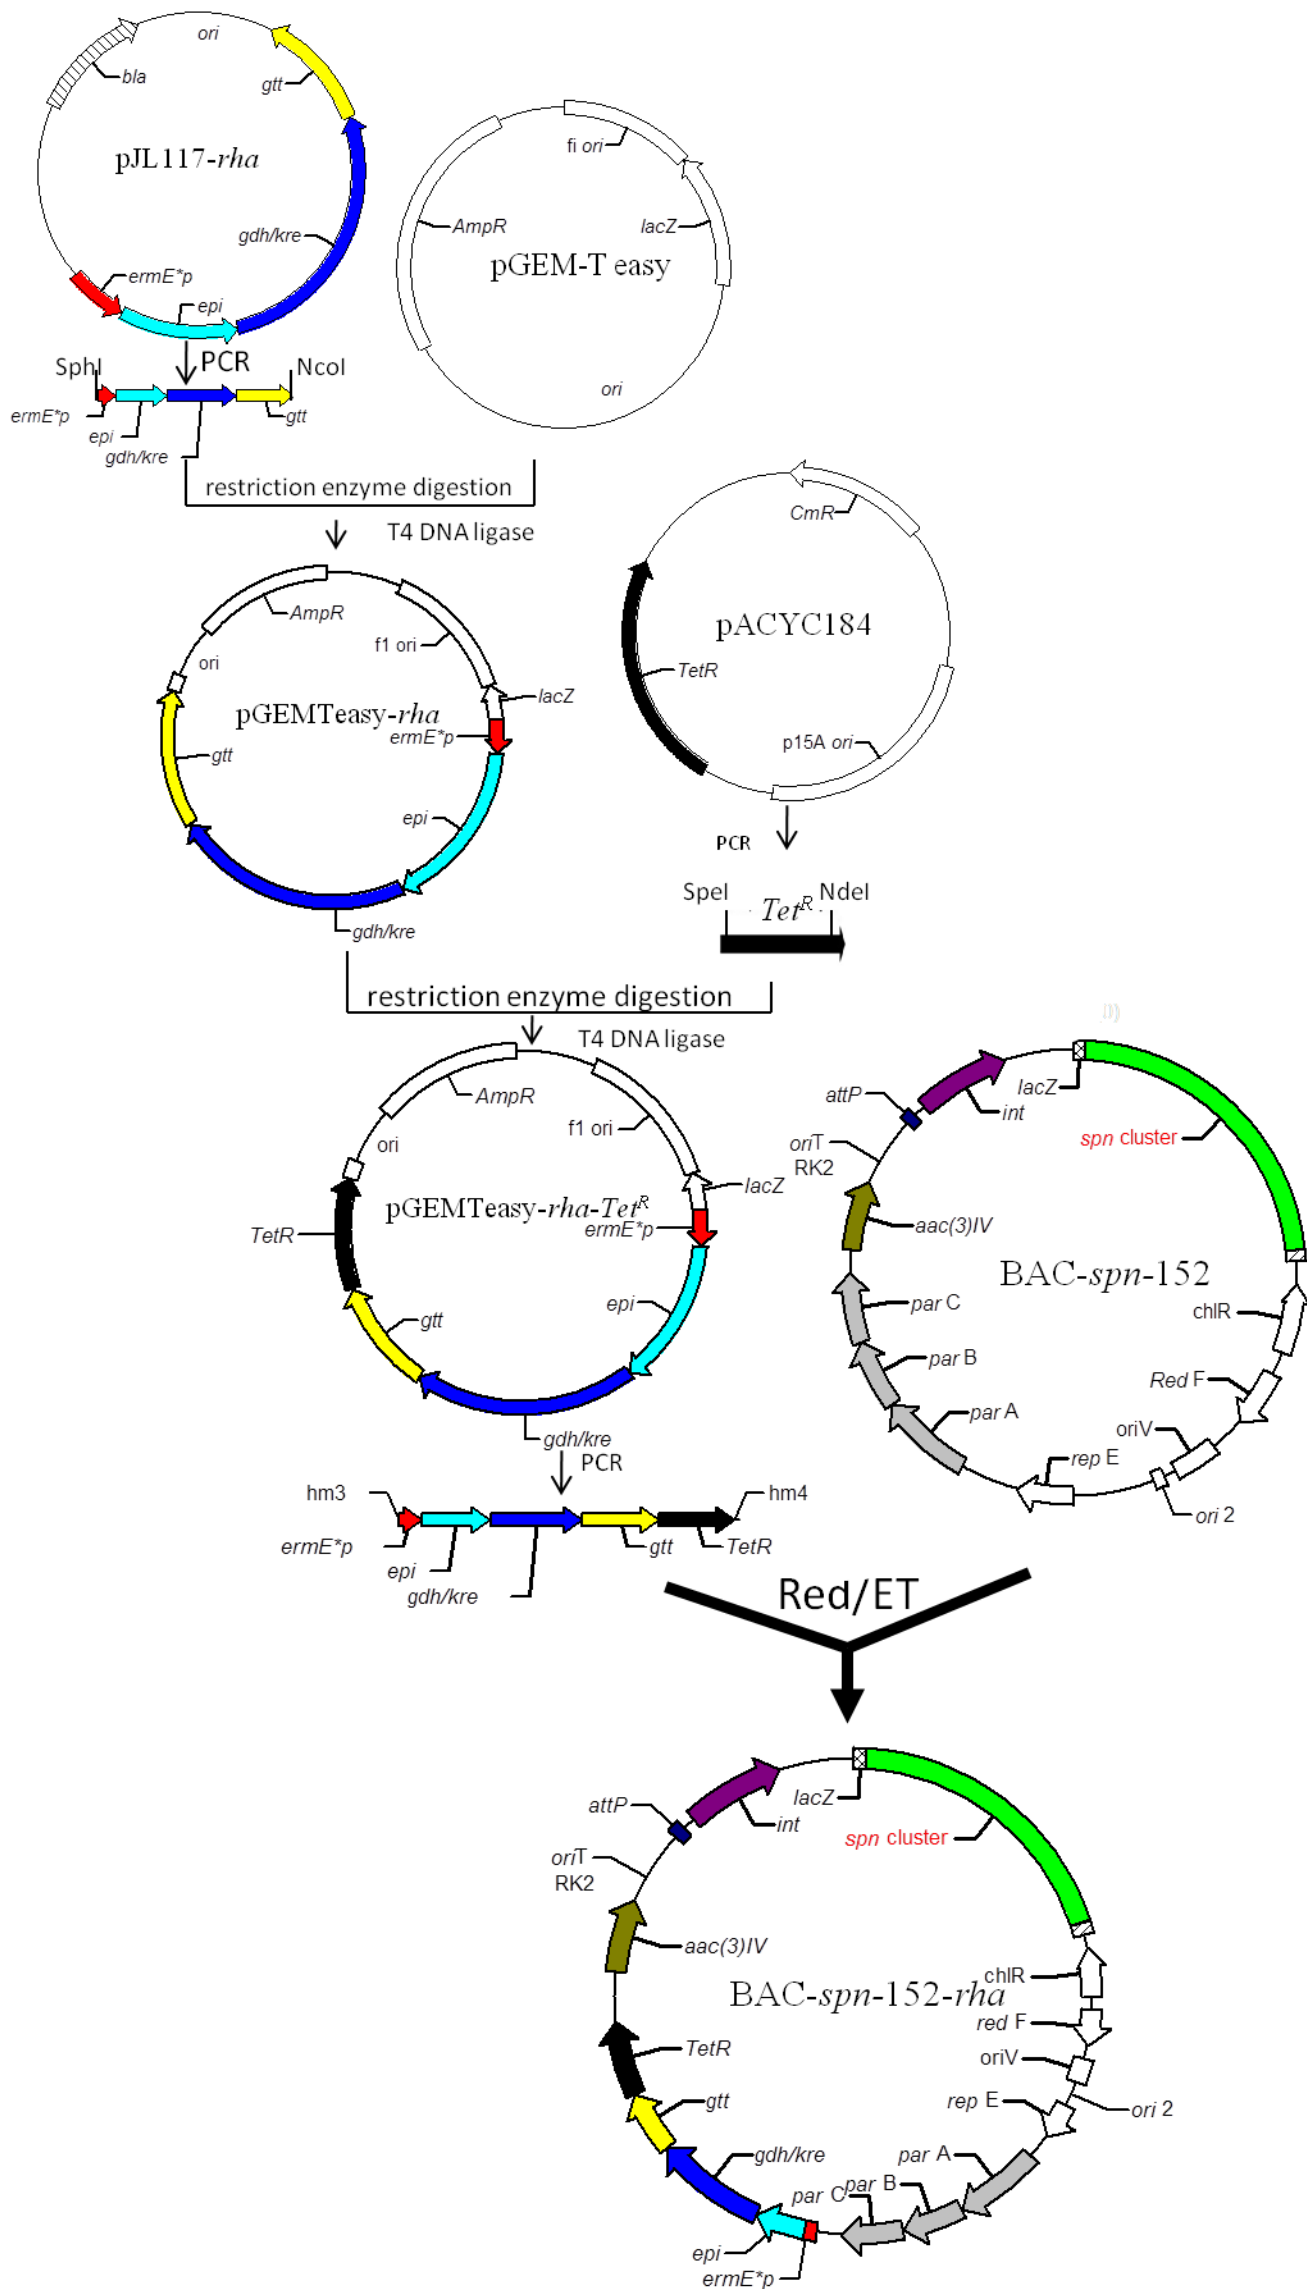

Supplement: Supplementary file 4 [file 1]
